# Supplementary material
Source: publisher figshare collection journal article supplement (https://sage.figshare.com/ndownloader/files/17513300)
Supplement: Supplementary file 1 [file 17513300]

# FORm - Data Collation Sheet (Readme)

Version 1.1.1

This Excel sheet is provided for detailed experimental data collation.

Please read the following information carefully.

The data **dictionary contains** common terms and agreements on data standardization and harmonization within the FOR2591 consortium. Adherence to these principles is mandatory for data consistency and quality.

The following Excel-sheet comprises of tabs which may be used for experimental data collection.

It was designed for data harmonization between different labs of FOR2591.

If you find anything odd or have ideas for improvement, don't hesitate in contacting the admin (address hidden).

## FORm

### Information

This sheet gives basic information on each study.

Please use the "upload section" on [www.for.severity-assessment.de/](http://www.for.severity-assessment.de/) and complete all Meta-Data on your study. Further, you are required to provide **ARRIVE Guidelines** for each study.

### IMPORTANT

Always keep a copy of your uploaded data, e.g., in an Excel-Sheet like this, in case the database breaks down.

### Data N.N.

Please name the tab after your experimental parameter, i.e., "Data body weight" or "Burrowing" etc.

**IMPORTANT: Each experimental parameter goes into a SEPARATE tab!**

Provide column-wise **raw data** only.

Each row should have an index, i.e., an animal number etc.

Each column needs a header (character format).

Also, group information or other variables are required for contrasts.

Avoid empty data and provide variables for each animal.

Do not artificially introduce empty rows or columns.

Do not perform any calculations in the data tab.

Do not "make the tab look nice"; just enter pure and raw data.

Do not change the column headers "index" and "treatment".

Ideally, the data tab should contain two fixed columns and time data - nothing more.

Here is an example for raw body weight (%) data:

| index   | treatment | d0  | d1  | d2  | d3  | d4  |
|---------|-----------|-----|-----|-----|-----|-----|
| animal1 | Sham      | 98  | 100 | 102 | 103 | 99  |
| animal2 | Sham      | 97  | 101 | 101 | 100 | 101 |
| animal3 | Exposure1 | 101 | 90  | 73  | 85  | 95  |
| animal4 | Exposure1 | 97  | 93  | 70  | 81  | 96  |
| ...     | ...       | ... | ... | ... | ... | ... |

Each additional parameter gets such a table in a different tab! If you have, i.e., 4 parameters such as body weight, burrowing, nesting and grimace scale, you would end up with 4 separate tables.

Additional information can go to the SIF tab.

|                          |                                                                                                                                                                                                                                                                                                                                                                                                                                                                                                                                     |
|--------------------------|-------------------------------------------------------------------------------------------------------------------------------------------------------------------------------------------------------------------------------------------------------------------------------------------------------------------------------------------------------------------------------------------------------------------------------------------------------------------------------------------------------------------------------------|
| <b>Data X</b>            | <p>Add more data tabs if required.</p> <p>If you feel the need for data transformation or any calculations add another data tab.</p> <p>BUT: just one tab for each sub-experiment or parameter!</p> <p>Each corresponding data tab needs the same indices and treatments!</p>                                                                                                                                                                                                                                                       |
| <b>Time series</b>       | <p>If you add data as a time series (e.g., daily, weekly or monthly data) they should start at zero or at a baseline (see example above).</p> <p>Code each time point either by d, w or m (e.g., d0, d1, d2, d3 etc.) - even if you have other group-internal names for them.</p> <p>If you have pre-experimental times, you can indicate this by a minus, i.e., -d3, -d2, -d1, 0, d1, d2, d3...</p> <p>If day zero and baseline are different, name the baseline column "baseline".</p>                                            |
| <b>SIF</b>               | <p><b>(S)ample (i)nfomation (F)ile</b></p> <p>Each index (animal) may have any number of additional entries or variables.</p> <p>You may even add descriptive comments under the "comments" column.</p> <p>Make sure that there is always just 1 entry per field.</p> <p>If there is more to say, add it to the comments section.</p> <p>There can be any additional number of variables - just extend the table as needed.</p> <p>Avoid empty cells.</p> <p>You may add another SIF, if there are two different raw data sets.</p> |
| <b>Analysis</b>          | <p>This tab is reserved for <b><u>TABULAR</u></b> statistical analyses results.</p> <p>Here, ANOVA tables or t-test results etc. may be stored.</p> <p>Be clear about the results and write some commentary if necessary.</p> <p>If possible, provide effect sizes and measurements of precision (SEM, 95% confidence intervals).</p>                                                                                                                                                                                               |
| <b>Descriptive Plots</b> | <p>Provide plots as <u>extra figures</u> and upload them via the website.</p> <p>Possible formats are: *.jpeg and *.png (avoid *.tiff files here, they cannot be displayed well in browsers).</p> <p>Please <b>DO NOT</b> include plots in FORM.</p>                                                                                                                                                                                                                                                                                |
| <b>Further comments</b>  | <p>If there are any information left that cannot be covered by the previous tabs, they may be stored here. No specific format is required.</p> <p>Just write what is important.</p>                                                                                                                                                                                                                                                                                                                                                 |

Thank you and good luck with your research!

| Study Information                                                                                                    |  | User Input |
|----------------------------------------------------------------------------------------------------------------------|--|------------|
| <b>General Information</b>                                                                                           |  |            |
| Short title of the experiment                                                                                        |  |            |
| Name of scientists responsible (r)/involved (i)                                                                      |  |            |
| Institute                                                                                                            |  |            |
| Institution                                                                                                          |  |            |
| <b>Basic information</b>                                                                                             |  |            |
| Species                                                                                                              |  |            |
| Breeder                                                                                                              |  |            |
| Strain                                                                                                               |  |            |
| Sex                                                                                                                  |  |            |
| Age start of experiment                                                                                              |  |            |
| Duration of experiment                                                                                               |  |            |
| Prospective severity                                                                                                 |  |            |
| <b>Study Information</b>                                                                                             |  |            |
| Specific hypotheses/objectives                                                                                       |  |            |
| Study design (please provide a short description of the study design)                                                |  |            |
| Background (please provide information about the background of the study and the hypothesis addressed in your study) |  |            |
| Main conclusions (please provide a short paragraph with the main conclusion)                                         |  |            |
| Were the animals for the experiment chosen randomly?                                                                 |  |            |
| How?                                                                                                                 |  |            |
| <b>Analysis</b>                                                                                                      |  |            |
| Statistical methods                                                                                                  |  |            |
| Name units/dimensions of factors                                                                                     |  |            |
| Are there multiple levels in the experiment? If so, pls name.                                                        |  |            |
| Graphs (do not include figures in here! Upload them as extra *.jpeg files etc.)                                      |  |            |
| <b>Comments</b>                                                                                                      |  |            |
|                                                                                                                      |  |            |

| ARRIVE Guidelines                                                                                                                                                                                                                                                                                                                                                                                                                                                                                                                                                                                                                                                                                                                                                                                                                                                                                                     | User Input |
|-----------------------------------------------------------------------------------------------------------------------------------------------------------------------------------------------------------------------------------------------------------------------------------------------------------------------------------------------------------------------------------------------------------------------------------------------------------------------------------------------------------------------------------------------------------------------------------------------------------------------------------------------------------------------------------------------------------------------------------------------------------------------------------------------------------------------------------------------------------------------------------------------------------------------|------------|
| Ethical statement                                                                                                                                                                                                                                                                                                                                                                                                                                                                                                                                                                                                                                                                                                                                                                                                                                                                                                     |            |
| Experimental procedures                                                                                                                                                                                                                                                                                                                                                                                                                                                                                                                                                                                                                                                                                                                                                                                                                                                                                               |            |
| Experimental animals                                                                                                                                                                                                                                                                                                                                                                                                                                                                                                                                                                                                                                                                                                                                                                                                                                                                                                  |            |
| Housing and husbandry                                                                                                                                                                                                                                                                                                                                                                                                                                                                                                                                                                                                                                                                                                                                                                                                                                                                                                 |            |
| Allocating animals to experimental groups                                                                                                                                                                                                                                                                                                                                                                                                                                                                                                                                                                                                                                                                                                                                                                                                                                                                             |            |
| Sample Size                                                                                                                                                                                                                                                                                                                                                                                                                                                                                                                                                                                                                                                                                                                                                                                                                                                                                                           |            |
| Blinding procedures                                                                                                                                                                                                                                                                                                                                                                                                                                                                                                                                                                                                                                                                                                                                                                                                                                                                                                   |            |
| Experimental outcomes                                                                                                                                                                                                                                                                                                                                                                                                                                                                                                                                                                                                                                                                                                                                                                                                                                                                                                 |            |
| Baseline data (characteristics & health status etc.)                                                                                                                                                                                                                                                                                                                                                                                                                                                                                                                                                                                                                                                                                                                                                                                                                                                                  |            |
| Numbers analysed (inclusion/exclusion)                                                                                                                                                                                                                                                                                                                                                                                                                                                                                                                                                                                                                                                                                                                                                                                                                                                                                |            |
| Adverse events                                                                                                                                                                                                                                                                                                                                                                                                                                                                                                                                                                                                                                                                                                                                                                                                                                                                                                        |            |
| Interpretation/implications                                                                                                                                                                                                                                                                                                                                                                                                                                                                                                                                                                                                                                                                                                                                                                                                                                                                                           |            |
| Funding                                                                                                                                                                                                                                                                                                                                                                                                                                                                                                                                                                                                                                                                                                                                                                                                                                                                                                               |            |
| Generalisability/Translation                                                                                                                                                                                                                                                                                                                                                                                                                                                                                                                                                                                                                                                                                                                                                                                                                                                                                          |            |
| <b>Disclaimer</b>                                                                                                                                                                                                                                                                                                                                                                                                                                                                                                                                                                                                                                                                                                                                                                                                                                                                                                     |            |
| <p><b>a)</b> I hereby certify, that the uploaded study data and meta-information follow the mandatory governmental regulations and laws for animal experiments in the country they were conducted. <b>b)</b> Also, I assure that ethical guidelines, experimental procedures for severity minimization and the general rules of Good Scientific Practice were followed and can be provided in detail on request. <b>c)</b> Further, I concur in the use of the uploaded data by scientists within the consortium FOR2591 for further analysis and publication. <b>d)</b> I allow my contact information to be shared within project partners. <b>e)</b> If no responsible scientist is provided (r), the first name in the form under the field "Scientists" will be considered responsible. <b>f)</b> I am fully aware that I can revoke my approval in written form by contacting the admin. <b>[YES OR NO]</b></p> |            |
| Contact information (email, telephone etc.)                                                                                                                                                                                                                                                                                                                                                                                                                                                                                                                                                                                                                                                                                                                                                                                                                                                                           |            |

## Data dictionary (example)

| Variable      | Description                    | Data type | Coding     | Unit              | Scale   |
|---------------|--------------------------------|-----------|------------|-------------------|---------|
| animal_id     | Unique animal index            | text      |            |                   |         |
| treatment     | Treatment variable information | text      |            |                   |         |
| condition     | Further conditions             | text      |            |                   |         |
| subgroup      | Any more subgroup information  | text      |            |                   |         |
| day           | Current day number of animal   | number    |            |                   | metric  |
| date          | Date information (if needed)   | text      | dd/mm/yyyy |                   |         |
| bw_raw        | Raw body weight data           | number    |            | g                 | metric  |
| bw            | Normalized body weight data    | number    |            | percent (%)       | metric  |
| bwc           | Body weight change data        | number    |            | delta percent (%) | metric  |
| clinscore     | Clinical score                 | number    |            | score (1 to 6)    | ordinal |
| comment       | Comment field                  | text      |            |                   |         |
| and many more | ....                           |           |            |                   |         |
